# Supplementary material for: Plasmalemmal Vesicle Associated Protein (PLVAP) as a therapeutic target for treatment of hepatocellular carcinoma
Source: PubMed Central journal article supplement (PMC4233082; doi:10.1186/1471-2407-14-815), 2014-11-06

# **Plasmalemmal Vesicle Associated Protein (PLVAP) as a Therapeutic Target for Treatment of Hepatocellular Carcinoma**

**Y-H Wang, T-Y Cheng, T-Y Chen, K-M Chang, Vincent P. Chuang and K-J Kao**

## **Additional file 1 Supplementary Table and Figures**

Table S1. Primer and probe sequences for PLVAP and beta-actin real-time quantitative RT-PCR.

Figure S1. Laser capture micro-dissection of HCC vascular endothelial cells, HCC tumor cells and non-tumorous liver tissue.

Figure S2. Real time Taqman quantitative RT-PCR tracings for PLVAP and beta actin mRNAs in HCC vascular endothelial cells, HCC tumor cells and adjacent non-tumorous liver tissue.

Figure S3. Immunohistochemical staining of HEP3B tumor xenograft from SCID mouse for PLVAP expression using MECA32 anti-mouse PLVAP monoclonal antibody.

Figure S4. Bicistronic construct for production of MECA32-Fab-TF and SDS-PAGE of purified MECA32-Fab-TF.

Figures S5-A to S5-E. Effect of high dose of MECA32-Fab-TF (100  $\mu$ g) on BALB/c mice.

**Table S1. Primer and probe sequences for real-time quantitative RT-PCR for PLVAP and beta-actin.**

| <b>Gene</b> | <b>Forward Primer Sequence</b>  | <b>Reverse Primer Sequence</b>  | <b>Taqman Probe sequence</b> |
|-------------|---------------------------------|---------------------------------|------------------------------|
| PLVAP       | 5'-CCTTGAGCGTGAGTGTTCCTCA-3'    | 5'-GGCAGGGCTGGGAGTTG-3'         | 5'-AAGGAGTGGCTCCCCTCC-3'     |
| beta-Actin  | 5'-GTCCCCCAACTTGAGATGTATGAAG-3' | 5'-GTCTCAAGTCAGTGTACAGGTAAGC-3' | 5'-CTCCCAGGGAGACCAA-3'       |

The relative quantities of PLVAP mRNA were determined according to “Guide to Performing Relative Quantitation of Gene Expression Using Real-Time Quantitative PCR” published by Applied Biosystems.” The guide is available at [http://www3.appliedbiosystems.com/cms/groups/mcb\\_support/documents/generaldocuments/cms\\_042380.pdf](http://www3.appliedbiosystems.com/cms/groups/mcb_support/documents/generaldocuments/cms_042380.pdf).

**Figure S1. Laser capture micro-dissection of HCC vascular endothelial cells, HCC tumor cells and non-tumorous liver tissue.**

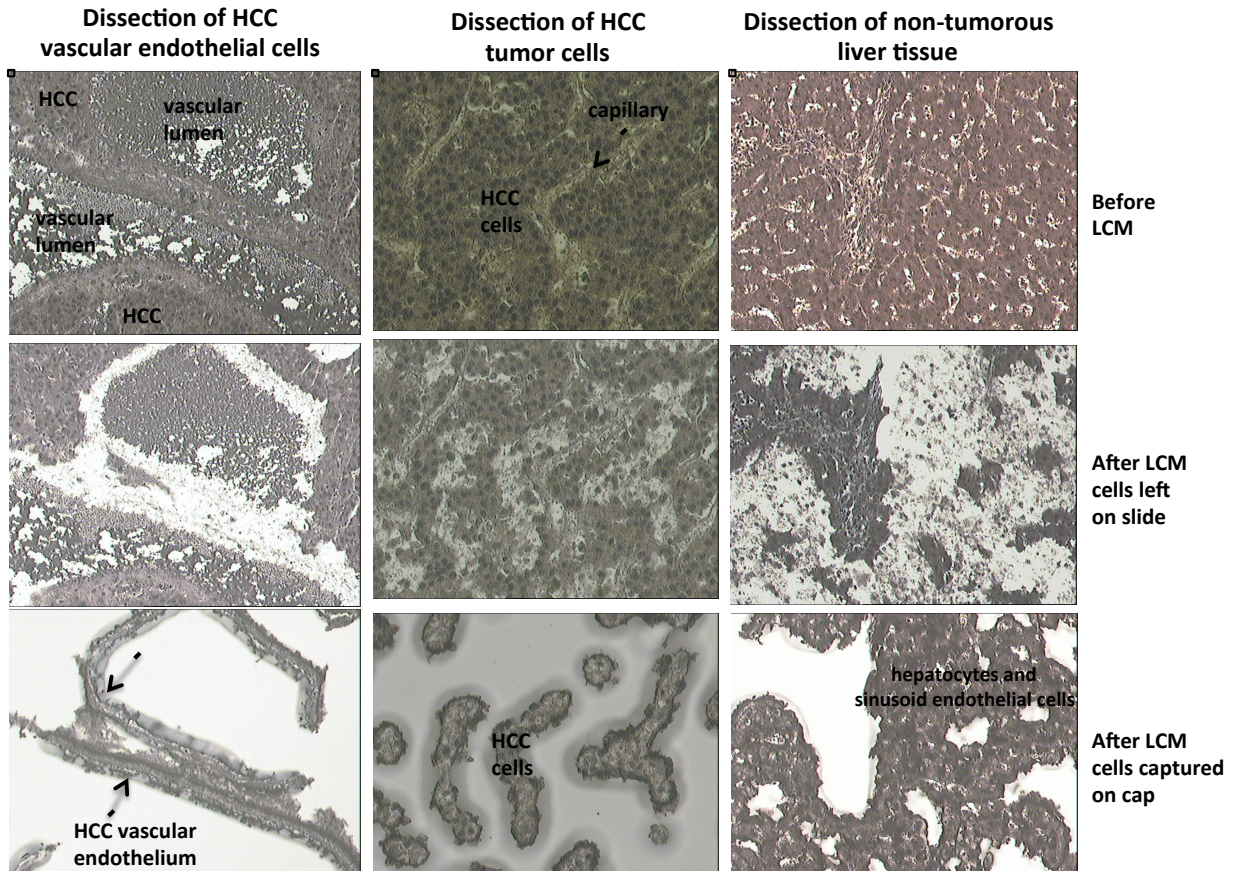

**Figure S2. Real time Taqman quantitative RT-PCR tracings for PLVAP and beta actin mRNAs in HCC vascular endothelial cells, HCC tumor cells and adjacent non-tumorous liver tissue.**

Two different HCC samples were studied (red and blue). Dashed lines are RT-PCR for beta actin and solid lines are RT-PCR for PLVAP.

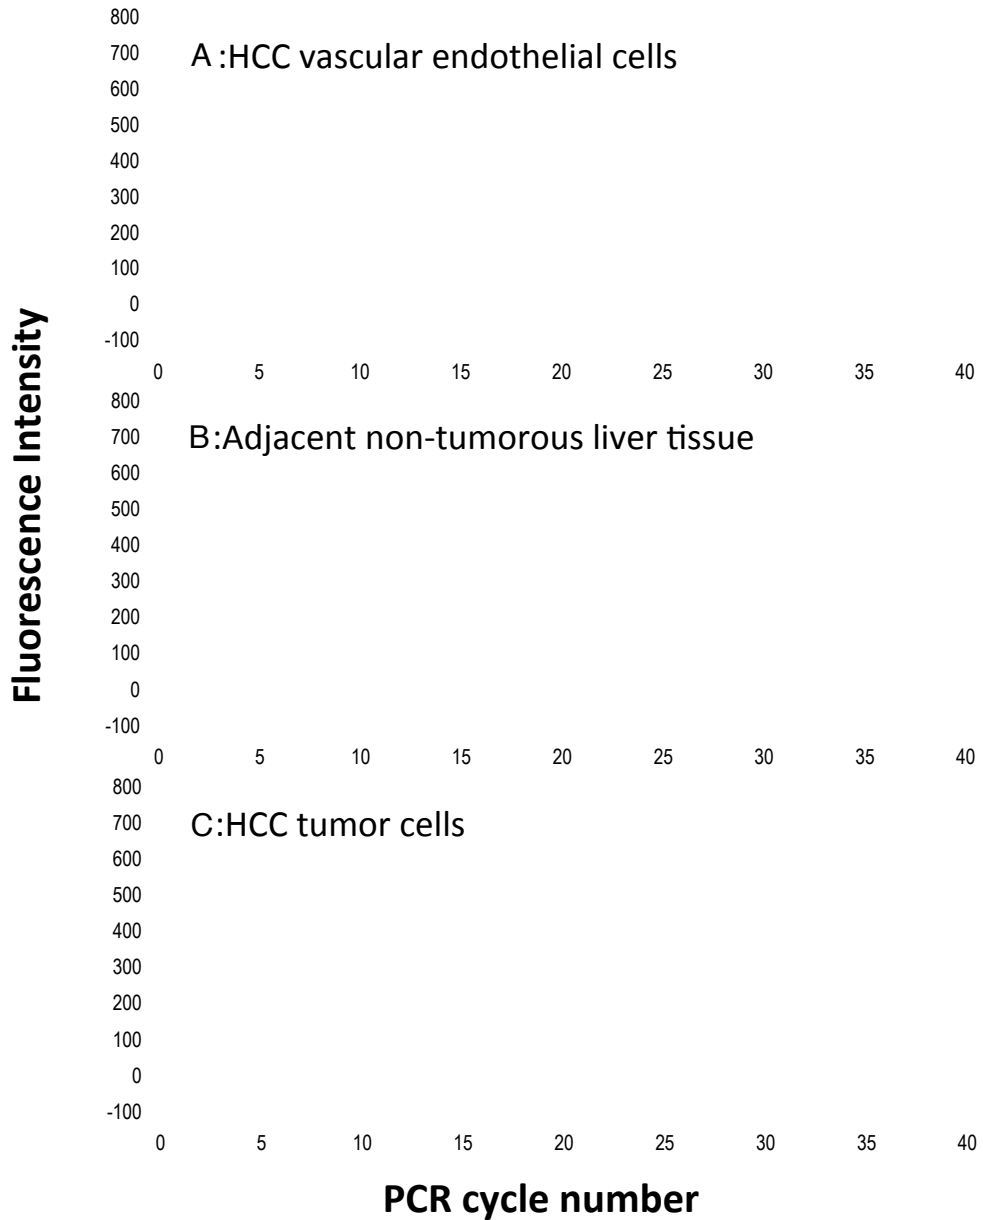

**Figure S3. Immunohistochemical staining of HEP3B tumor xenograft from SCID mouse for PLVAP expression using MECA32 anti-mouse PLVAP monoclonal antibody.**

Vascular endothelial cells of tumor blood vessels were stained positively in brown (arrows). The photomicrograph was taken at 100x magnification.

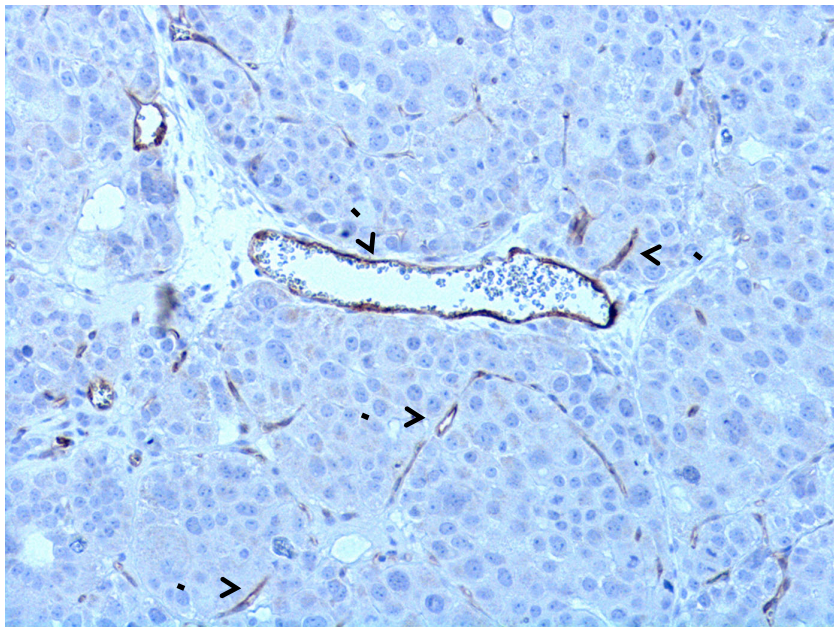

**Figure S4. Bicistronic construct for production of MECA32-Fab-TF and SDS-PAGE of purified MECA32-Fab-TF.**

**A:** The construct inserted in pET26b plasmid. RBS: ribosome binding site; VH: variable domain of IgG heavy chain; CH1: constant domain 1 of heavy chain; VK: variable domain of kappa light chain; CK: constant domain of kappa light chain; sTF: extracellular domain of tissue factor; His: histidine-tag.

**B:** SDS-PAGE of purified MECA332-Fab-TF and a diagram of MECA32-Fab-TF. NR: non-reducing; R: reducing.

**A. Bicistronic construct for production of MECA32-Fab-TF**

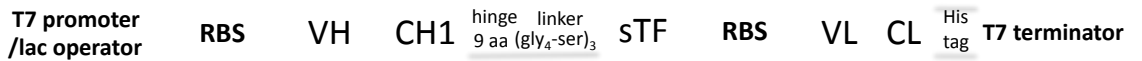

**B. SDS-PAGE and protein domains of purified MECA32-Fab-TF**

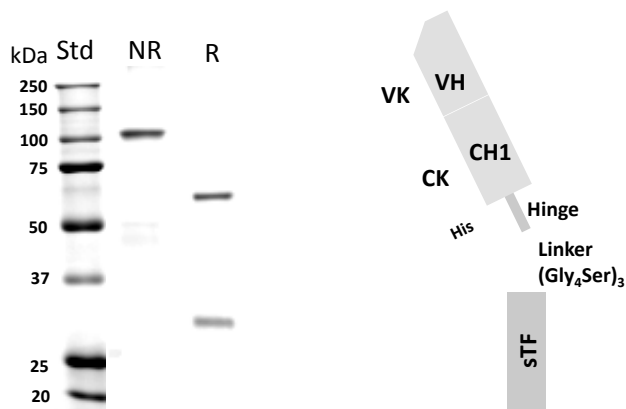

**Figures S5-A to S5-E. Effect of high dose of MECA32-Fab-TF (100 µg) on BALB/c mice.**

Four male and four female mice of 8 weeks old were divided into four groups. Each group consisted of 1 male and 1 female. Each mouse was injected with 100µg MECA32-Fab-TF through a tail vein. Mice before and after injection were bled for plasma concentrations of MECA32-Fab-TF (Fig. S5-A), factor X (Fig. S5-B) and fibrinogen (Fig. S5-C), and platelet count (Fig. S5-D). Groups I, II, III, and IV were bled at 30 seconds, 10 minutes, 30 minutes and 24 hours after injection, separately. Groups I and II were bled again on day 4 after injection. Groups III and IV were bled on day 6. Body weight (Fig. S5-E) and gross appearance were monitored. Mouse factor X and fibrinogen concentrations were measured using ELISA kits from Oxford Biomedical Research and Abcam, respectively. Plasma MECA32-Fab-TF was measured using an antigen-capturing ELISA.

Figure S5-A Circulation half life of MECA32-Fab-TF

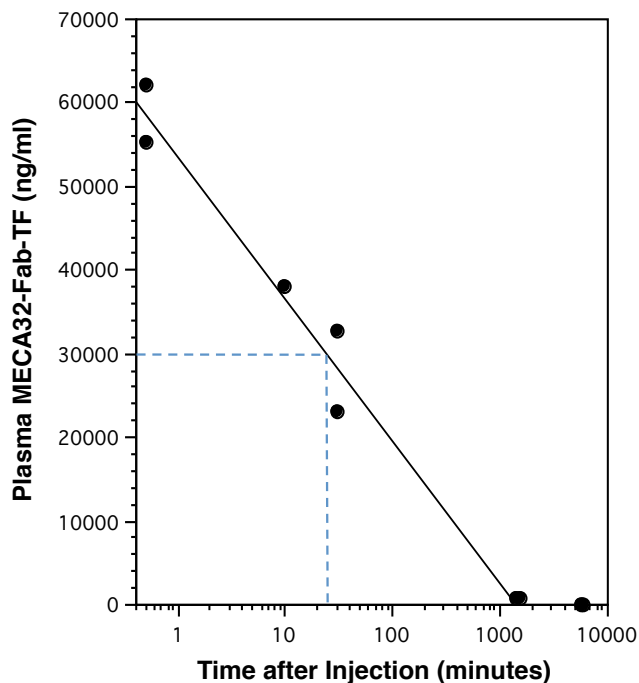

Figure S5-B Change of plasma factor X concentration after injection of 100  $\mu\text{g}$  MECA32-FAB-TF. Only blood samples collected up to 96 hours after injection were studied.

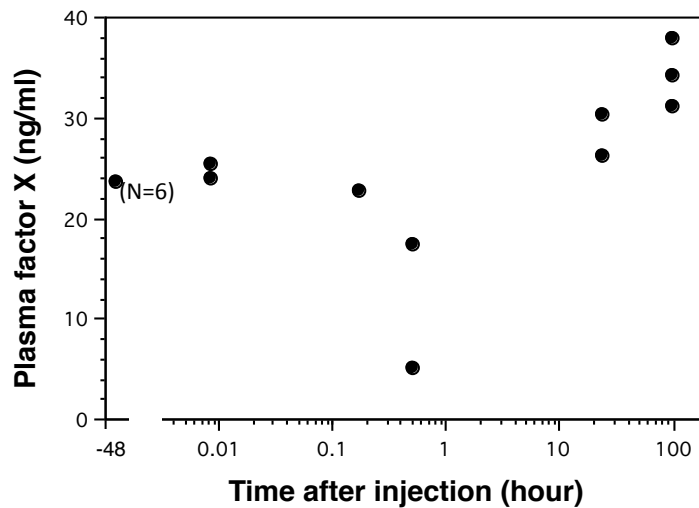

Figure S5-C Change of plasma fibrinogen concentration after injection of 100  $\mu\text{g}$  MECA32-FAB-TF. Only blood samples collected up to 96 hours after injection were studied.

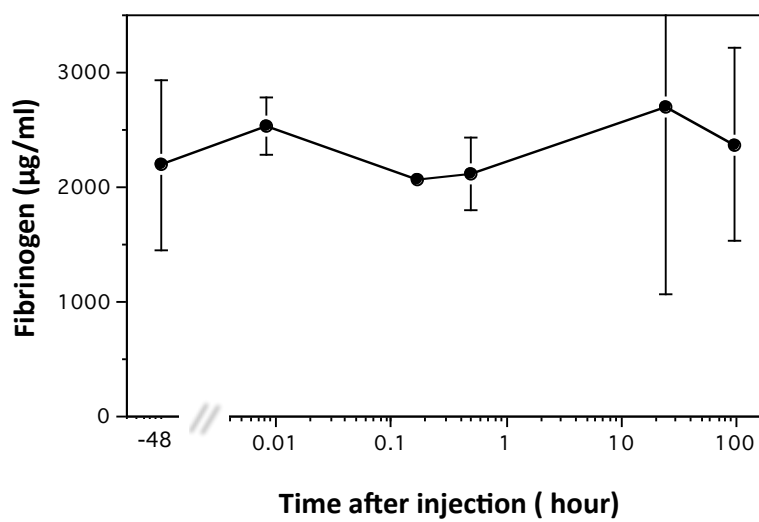

Supplement: 12885_2014_4997_MOESM1_ESM.pdf [file 12885_2014_4997_MOESM1_ESM.pdf]
